# Supplementary material for: Inventory of the Secondary Metabolite Biosynthetic Potential of Members within the Terminal Clade of the Fusarium solani Species Complex
Source: MDPI journal article supplement (doi:10.3390/jof9080799), 2023-07-28
Supplement: s1 [file s1]

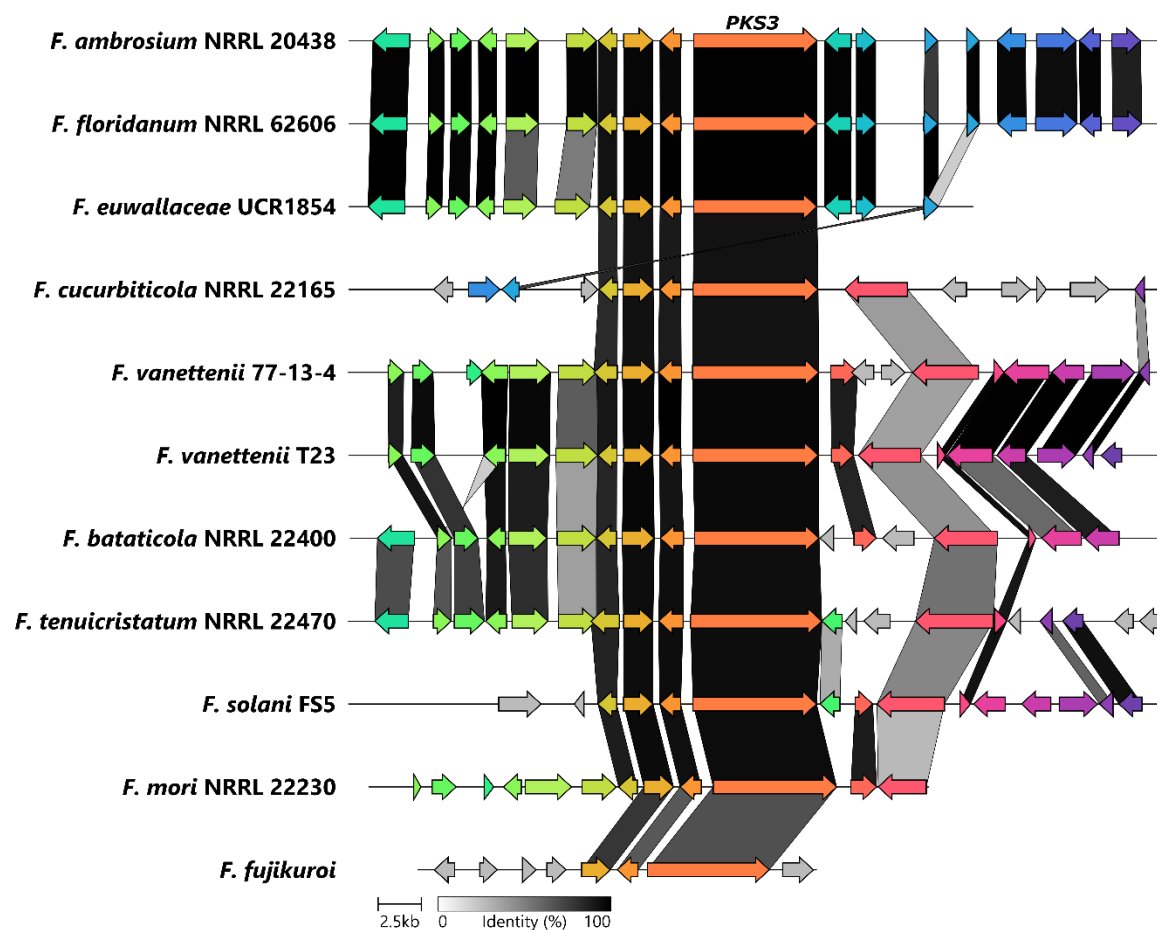

**Figure S2.** Genetic organization and conservation of fusarubin/oxyjavanicin BGC across the FSSC genomes and *F. fujikuroi*. Each color represents a different gene and the core biosynthetic gene *PKS3* is indicated.

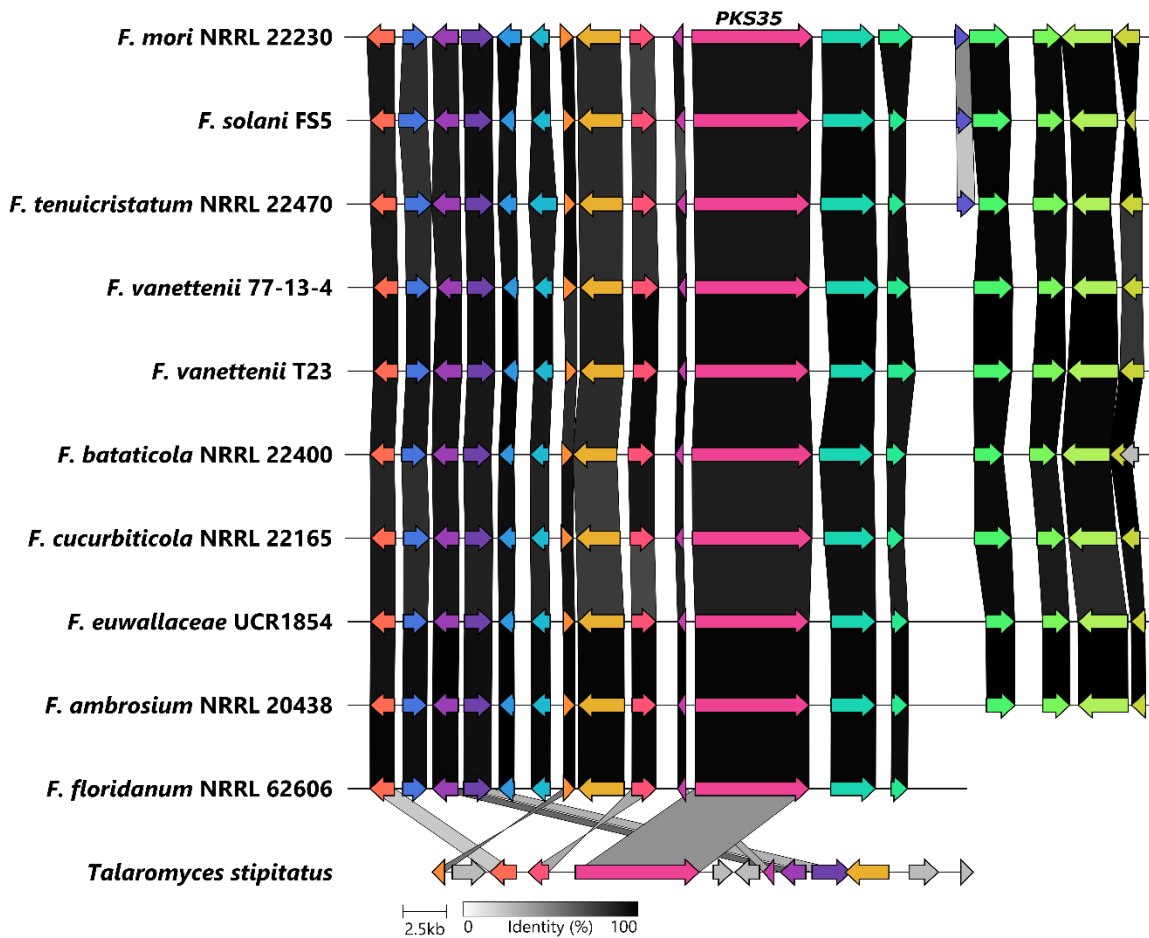

**Figure S3.** Genetic organization and conservation of the red pigment BGC across the FSSC genomes and *Talaromyces stipitatus*. Each color represents a different gene and the core biosynthetic gene *PKS35* is indicated.

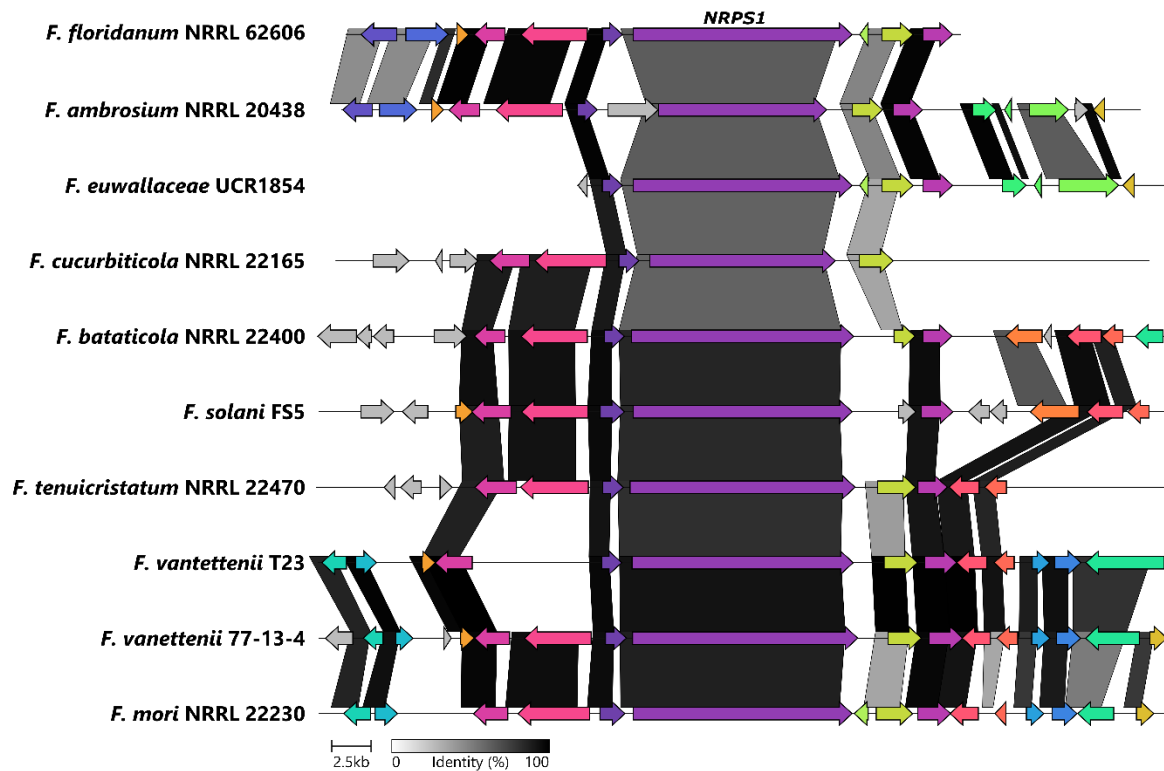

**Figure S4.** Genetic organization and conservation of the malonichrome BGC across the FSSC genomes. Each color represents a different gene and the core biosynthetic gene *NRPS1* is indicated.

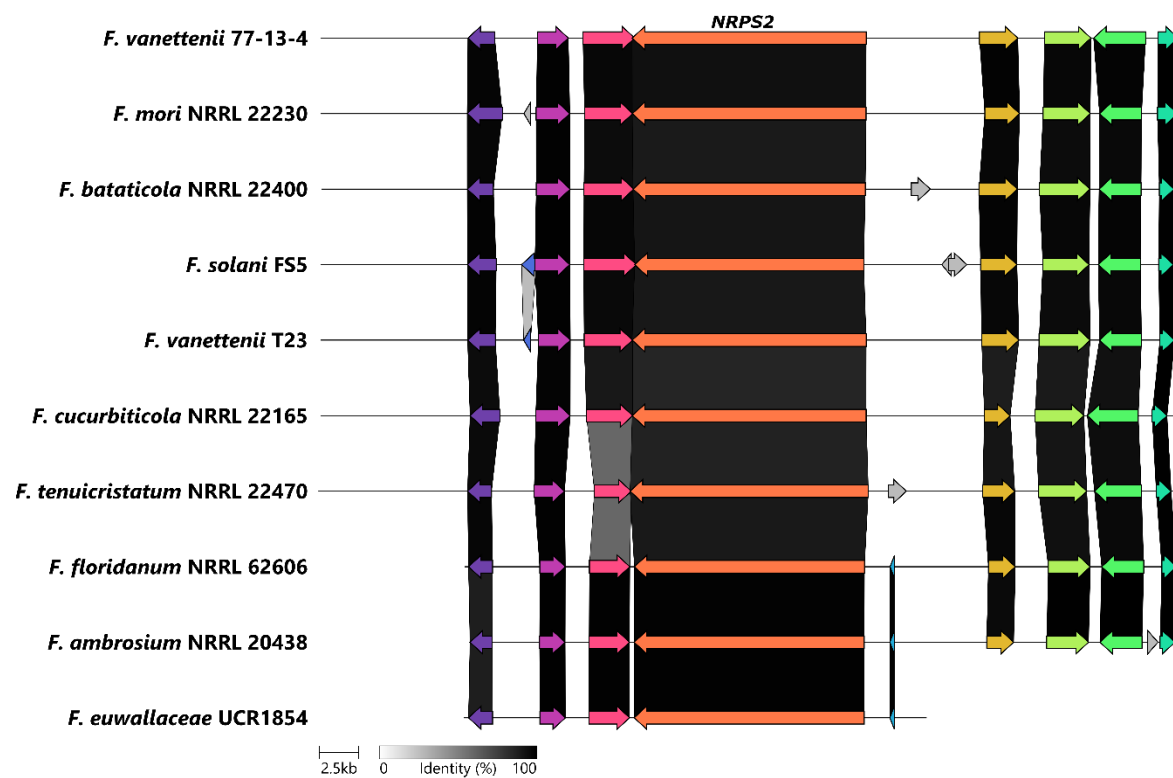

**Figure S5.** Genetic organization and conservation of the ferricrocin BGC across the FSSC genomes. Each color represents a different gene and the core biosynthetic gene *NRPS2* is indicated.

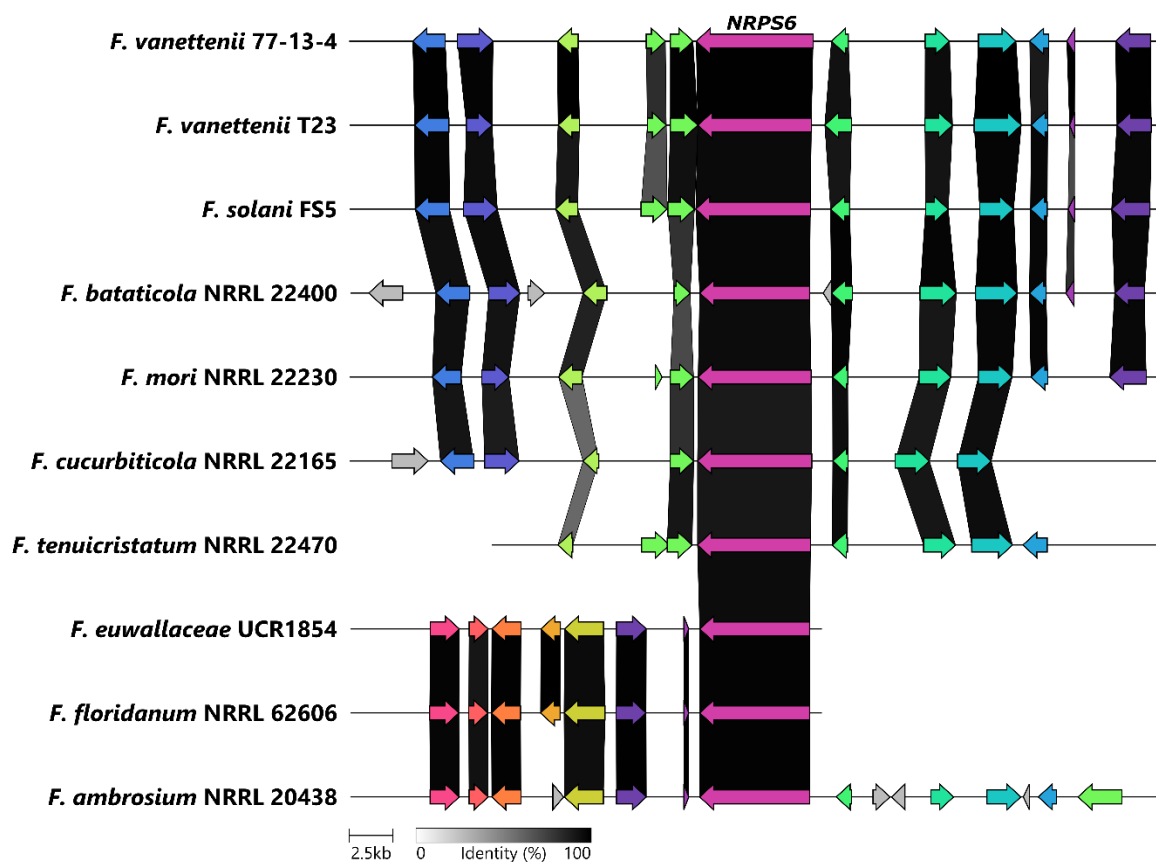

**Figure S6.** Genetic organization and conservation of the triacetylfusarinine/fusarinine BGC across the FSSC genomes. Each color represents a different gene and the core biosynthetic gene *NRPS6* is indicated.

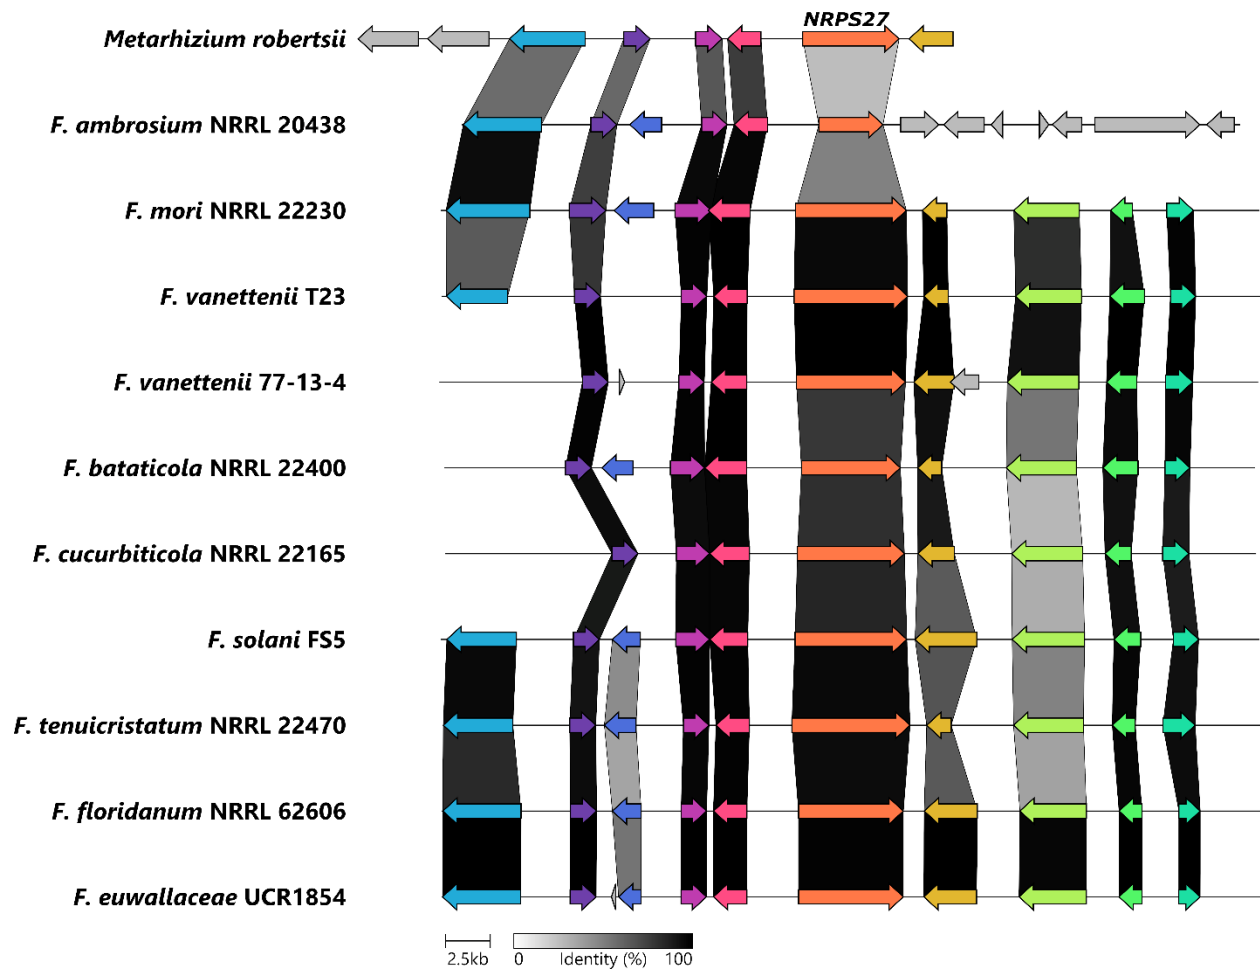

**Figure S7.** Genetic organization and conservation of the putative metachelin BGC across the FSSC genomes and *Metarhizium robertsii*. Each color represents a different gene and the core biosynthetic gene *NRPS27* is indicated.

T-GCF1

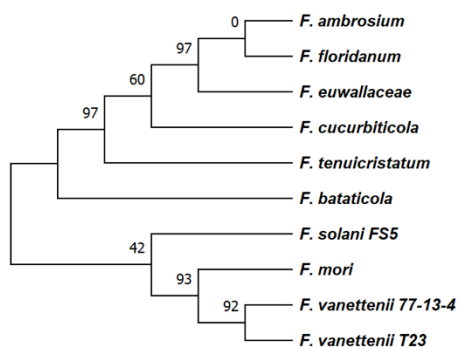

T-GCF2

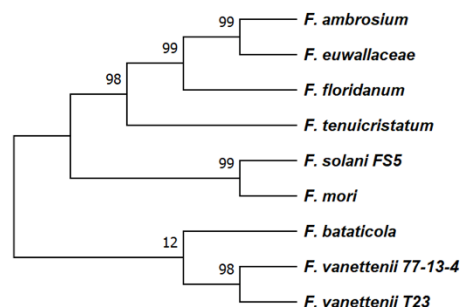

T-GCF3

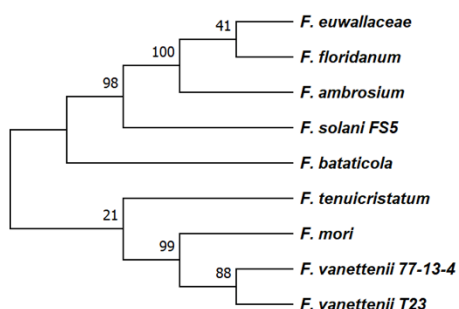

T-GCF4

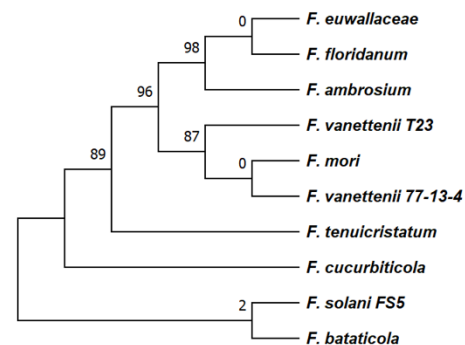

T-GCF5

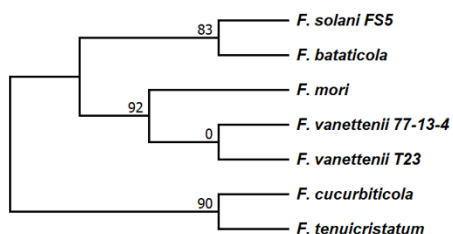

T-GCF6

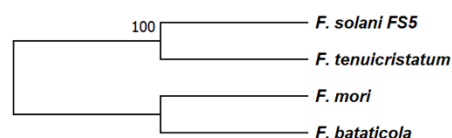

T-GCF7

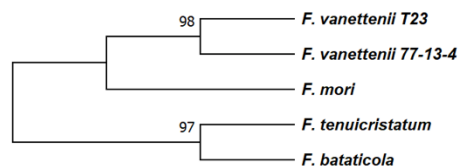

**Figure S8.** The multi-locus phylogenetic analysis of the terpene GCFs generated by BiG-SCAPE. Only the T-GCFs shared by at least three members of FSSC isolates are shown. T-GCF4, T-GCF5, and T-GCF6 are predicted to produce squalstatin S1, lanosterol/clavaric acid, and aspterric acid, respectively.



### I-GCF1

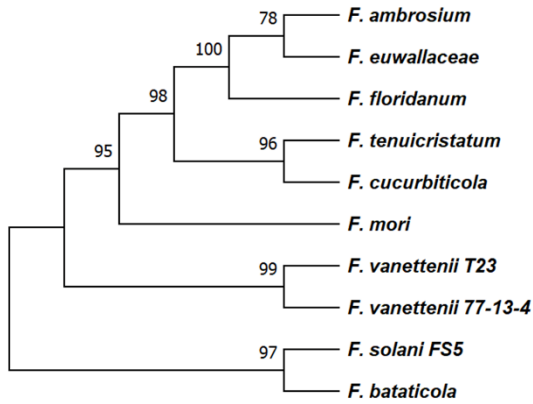

### I-GCF2

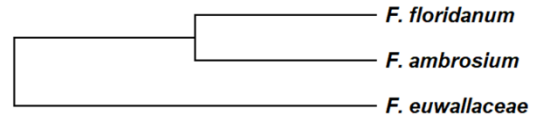

**Figure S9.** The multi-locus phylogenetic analysis of the indole GCFs generated by BiG-SCAPE. Only the I-GCFs shared by at least three members of FSSC isolates are shown.

### P-GCF1

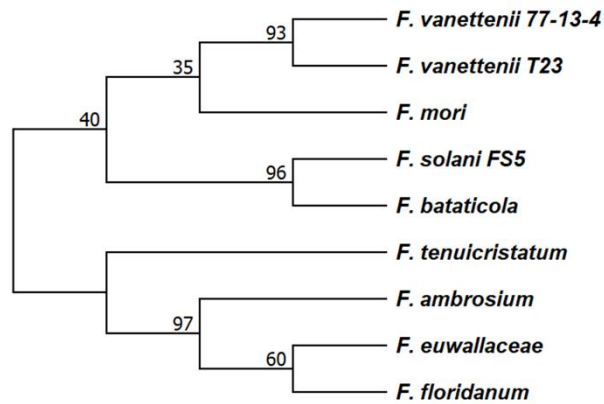

**Figure S10.** The multi-locus phylogenetic analysis of the phosphonate GCFs generated by BiG-SCAPE. Only the P-GCFs shared by at least three members of FSSC isolates are shown.
