# Supplementary material for: Inventory of the Secondary Metabolite Biosynthetic Potential of Members within the Terminal Clade of the Fusarium solani Species Complex
Source: J Fungi (Basel). 2023 Jul 28;9(8):799. doi: 10.3390/jof9080799 (PMC10455376; doi:10.3390/jof9080799)
Supplement: Supplementary file 1 [file jof-09-00799-s001.zip › Supplementary_Tables_Jof.xlsx]

## Sheet: Table S1
Table S1: Secondary metabolite biosynthetic gene clusters (BGCs), their core biosynthetic protein IDs, and the most similar known cluster as predicted by antiSMASH in ten clade 3 FSSC genomes.
Species	BGC type	Protein ID	Most similar known cluster
F. vanettenii 77-13-4	Terpene	1614635	Squalestatin S1
	T1PKS	1752482	Gibepyrone
	T1PKS	1523684	Duclauxin
	NRPS	1758393	Sansalvamide
	NRPS + T1PKS	1529154	NG-391
	NRPS	1720093	Metachelin
	Terpene	1513637	Clavaric acid
	T1PKS	1761150	Oxyjavanicin
	Terpene	1498145	Aspterric acid
F. vanettenii T23	Terpene	336608	Clavaric acid
	NRPS + T1PKS	426079	NG-391
	T1PKS	427337	Oxyjavanicin
	T1PKS	428646	Duclauxin
	NRPS	415406	Sansalvamide
	Terpene	99341	Squalestatin S1
	T1PKS	422380	Gibepyrone
	NRPS	153801	Metachelin
F. tenuicristatum NRRL 22470	Terpene	258687	Squalestatin S1
	T1PKS	724427	Duclauxin
	NRPS	353854	Metachelin
	Terpene	638175	Clavaric acid
	NRPS + T1PKS	640914, 694717	Cyclosporin C
	Terpene	524104	Aspterric acid
	NRPS	730639	Sansalvamide
	T1PKS	730653	Gibepyrone
	T1PKS	53873, 685102	Radicicol
	T1PKS	649413	Oxyjavanicin
	Terpene	708393	Eupenifeldin
F. mori NRRL 22230	NRPS	134726	Metachelin
	NRPS + NRPS-like	277890, 288088	Sansalvamide
	NRPS + T1PKS	304906	NG-391
	T1PKS	306580	Duclauxin
	T1PKS	299708	Gibepyrone
	Terpene	293763	Squalestatin S1
	Terpene	271816	Clavaric acid
	Terpene	283731	Gibberellin
	T1PKS	303550	Oxyjavanicin
F. cucurbiticola NRRL 22165	Terpene	4572	Squalestatin S1
	Terpene	415869	Clavaric acid
	NRPS	465178, 438257, 465182, 465183	Sansalvamide
	T1PKS	484567	Duclauxin
	T1PKS	489292	Oxyjavanicin
	NRPS	246993	Metachelin
F. bataticola NRRL 22400	T1PKS	244271	Gibepyrone
	Terpene	2725	Squalestatin S1
	NRPS	220000	Sansalvamide
	polyketide (NRPS-like)	378466	Pyranonigrin E
	NRPS + T1PKS	378692	NG-391
	Terpene	269544	Clavaric acid
	T1PKS	249404	Duclauxin
	NRPS	386777	Metachelin
	T1PKS	388089	Oxyjavanicin
	T1PKS + terpene	372244, 236775	Aspterric acid
	NRPS + T1PKS	380602	Curvupallide-B
F. solani FS5	T1PKS	557112	Duclauxin
	Terpene	98474	Squalestatin S1
	NRPS + T1PKS	578349	NG-391
	NRPS	442051	Sansalvamide
	Terpene	490730	Clavaric acid
	NRPS	71658	Metachelin
	T1PKS	564909	Oxyjavanicin
	T1PKS	432420	Gibepyrone
	NRPS + T1PKS (NRP)	574507, 574517	Cyclosporin C
F. ambrosium NRRL 20428	Terpene	CDV31_000015	Squalestatin S1
	T1PKS	CDV31_001766	Duclauxin
	T1PKS	CDV31_004764	Monacolin K
	T1PKS	CDV31_005496	Oxyjavanicin
	NRPS	CDV31_005868	Metachelin
F. euwallaceae UCR1854	NRPS	BHE90_009087	Metachelin
	T1PKS	BHE90_012771	Oxyjavanicin
	T1PKS	BHE90_003487	Duclauxin
	Terpene	BHE90_006392	Squalestatin S1
	T1PKS	BHE90_006524	Gibepyrone
F. floridanum NRRL 62606	NRPS	CEP51_005380	Metachelin
	T1PKS	CEP51_007749	Duclauxin
	T1PKS	CEP51_008742	Monacolin K
	T1PKS	CEP51_003755	Gibepyrone
	Terpene	CEP51_015043	Squalestatin S1
	T1PKS	CEP51_004260	Oxyjavanicin

## Sheet: Table S2
Table S2: List of reference PKS proteins from various Fusarium and fungal species used in this study.
Species	Strain	PKS clades	Protein ID or NCBI accession #	Metabolite
Fusarium oxysporum f. sp. lycopersici	Fol4287	PKS 3	FOXG_05816	Fusarubins
Fusarium oxysporum f. sp. lycopersici	Fol4287	PKS 5	FOXG_10805
Fusarium oxysporum f. sp. lycopersici	Fol4287	PKS 7	FOXG_03051
Fusarium oxysporum f. sp. lycopersici	Fol4287	PKS 8	FOXG_11954
Fusarium oxysporum f. sp. lycopersici	Fol4287	PKS 16	FOXG_04757	Bikaverin
Fusarium oxysporum f. sp. lycopersici	Fol4287	PKS 17	FOXG_02884	Depudecin
Fusarium oxysporum f. sp. lycopersici	Fol4287	PKS 18	FOXG_15296	Equisetin
Fusarium oxysporum f. sp. lycopersici	Fol4287	PKS 19	FOXG_11892
Fusarium oxysporum f. sp. lycopersici	Fol4287	PKS 20	FOXG_03945
Fusarium oxysporum f. sp. lycopersici	Fol4287	PKS 21	FOXG_15248	Fusaric acid
Fusarium oxysporum f. sp. lycopersici	Fol4287	PKS 22	FOXG_14850
Fusarium oxysporum f. sp. lycopersici	Fol4287	PKS 22	FOXG_15886
Fusarium oxysporum f. sp. lycopersici	Fol4287	PKS 27	FOXG_14587
Fusarium oxysporum f. sp. lycopersici	Fol4287	PKS 28	FOXG_02741
Fusarium oxysporum f. sp. melonis	NRRL 26406	PKS 51	FOMG_16245
Fusarium vanettenii	77-13-4	PKS 112	46230
Fusarium vanettenii	77-13-4	PKS 3	101778	Fusarubins
Fusarium vanettenii	77-13-4	PKS 7	91827
Fusarium vanettenii	77-13-4	PKS 8	123282
Fusarium vanettenii	77-13-4	PKS 10	70660	Fusarins
Fusarium vanettenii	77-13-4	PKS 22	106233
Fusarium vanettenii	77-13-4	PKS 29	78513
Fusarium vanettenii	77-13-4	PKS 30	37058
Fusarium vanettenii	77-13-4	PKS 31	72858
Fusarium vanettenii	77-13-4	PKS 32	106474
Fusarium vanettenii	77-13-4	PKS 33	42353
Fusarium vanettenii	77-13-4	PKS 35	33672	Perithecial pigment
Fusarium vanettenii	77-13-4	PKS 119	123123
Fusarium graminearum	PH-1	PKS 1	FGSG_17387
Fusarium graminearum	PH-1	PKS 2	FGSG_04694
Fusarium graminearum	PH-1	PKS 3	FGSG_09182	Fusarubins
Fusarium graminearum	PH-1	PKS 4	FGSG_17745	Zearalenone
Fusarium graminearum	PH-1	PKS 5	FGSG_17677
Fusarium graminearum	PH-1	PKS 6	FGSG_08208	Fusaristatin
Fusarium graminearum	PH-1	PKS 7	FGSG_08795
Fusarium graminearum	PH-1	PKS 8	FGSG_03340	Gibepyrone
Fusarium graminearum	PH-1	PKS 9	FGSG_10464	Fusarielins
Fusarium graminearum	PH-1	PKS 10	FGSG_07798	Fusarins
Fusarium graminearum	PH-1	PKS 11	FGSG_01790
Fusarium graminearum	PH-1	PKS 12	FGSG_02324	Aurofusarin
Fusarium graminearum	PH-1	PKS 13	FGSG_02395	Zearalenone
Fusarium graminearum	PH-1	PKS 14	FGSG_03964	Orsellinic acid
Fusarium graminearum	PH-1	PKS 15	FGSG_04588
Fusarium graminearum	CS3005	PKS 52	EYB25392	Alternapyrone
Fusarium verticillioides	7600	PKS 16	FVEG_03379	Bikaverin
Fusarium verticillioides	7600	PKS 17	FVEG_14911	Depudecin
Fusarium verticillioides	7600	PKS 18	FVEG_12610	Equisetin
Fusarium verticillioides	7600	PKS 19	FVEG_10497
Fusarium verticillioides	7600	PKS 20	FVEG_11932
Fusarium verticillioides	7600	PKS 21	FVEG_12523	Fusaric acid
Fusarium verticillioides	7600	PKS 22	FVEG_17587
Fusarium verticillioides	7600	PKS 23	FVEG_16698
Fusarium verticillioides	7600	PKS 24	FVEG_00316	Fumonisin
Fusarium verticillioides	7600	PKS 25	FVEG_08425
Fusarium verticillioides	7600	PKS 26	FVEG_05537
Fusarium fujikuroi	IMI58289	PKS 36	FFUJ_12066
Fusarium fujikuroi	IMI58289	PKS 37	FFUJ_12074
Fusarium fujikuroi	IMI58289	PKS 38	FFUJ_11199
Fusarium fujikuroi	IMI58289	PKS 39	FFUJ_12239	Fujikurin
Fusarium pseudograminearum	CS3096	PKS 40	FPSE_09187	W493 B
Fusarium clavum	CS3069	PKS 41	BN850_0135900
Fusarium clavum	CS3069	PKS 42	BN850_0069830
Fusarium avenaceum	Fa05001	PKS 43	FAVG1_07769
Fusarium avenaceum	Fa05001	PKS 44	FAVG1_08719	Solanapyrone
Fusarium avenaceum	Fa05001	PKS 45	FAVG1_04674	Sambutoxin
Fusarium avenaceum	Fa05001	PKS 46	FAVG1_10226
Fusarium avenaceum	Fa05001	PKS 47	FAVG1_04649
Fusarium avenaceum	Fa05001	PKS 48	FAVG1_07921
Fusarium avenaceum	Fa05001	PKS 49	FAVG1_08496
Fusarium avenaceum	Fa05001	PKS 50	FAVG1_11699
Fusarium avenaceum	Fa05001	PKS 53	FAVG1_07922
Fusarium avenaceum	FA05001	PKS 68	FAVG1_07658
Fusarium avenaceum	LH27	PKS 60	Faven7d
Fusarium avenaceum	LH27	PKS 67	Faven7c
Fusarium bulbicola	NRRL 13618	PKS 54	Fbu_86	Orcinaldehyde
Fusarium bulbicola	NRRL 13618	PKS 59	Fbu_946
Fusarium bulbicola	NRRL 13618	PKS 63	Fbu_2121
Fusarium thapsinum	FRC M-6563	PKS 55	Fth_11698	2,4-dihydroxy-6-[2-oxonona-trienyl]benzaldehyde
Fusarium thapsinum	FRC M-6563	PKS 64	Fth_11701	2,4-dihydroxy-6-[2-oxonona-trienyl]benzaldehyde
Fusarium circinatum	Fsp34	PKS 56	FCIR_08230	Mellein
Fusarium redolens	NRRL 22901	PKS 57	Fre_139
Fusarium redolens	NRRL 22901	PKS 65	Fre_602
Fusarium aywerte	NRRL 25410	PKS 58	Fay_343
Fusarium aywerte	NRRL 25410	PKS 71	Fay_510
Fusarium miscanthi	NRRL 26231	PKS 61	Fmi_33
Fusarium miscanthi	NRRL 26231	PKS 70	Fmi_106
Fusarium scirpi	NRRL 06979	PKS 62	Fsc_99
Fusarium scirpi	NRRL 06979	PKS 66	Fsc_106
Fusarium dlaminii	NRRL 13164	PKS 69	Fdl_00472	Fusaridione
Aspergillus mulundensis	DSM 5745	PKS 73	XP 026606016.1
Colletotrichum scovillei	TJNH1	PKS 74	XP 035325793.1
Rosellinia necatrix	W97	PKS 75	GAP93000.1
Cylindrodendrum hubeiense	IHI 201604	PKS 76	KAF7546534.1
Cordyceps javanica	IJ1G	PKS 77	TQV91536.1
Didymosphaeria enalia	CBS 304.66	PKS 82	KAF2257974.1	Sorbicillin
Cylindrodendrum hubeiense	IHI 201604	PKS 83	KAF7554237.1	Chaetoviridin
Coccidioides posadasii	C735 delta SOWgp	PKS 84	XP 003067742.1
Pseudogymnoascus sp.	VKM F-3808	PKS 85	KFY00088.1
Cylindrodendrum hubeiense	IHI 201604	PKS 86	KAF7554686.1
Aspergillus rambellii	SRRC1468	PKS 87	KKK16042.1
Verticillium alfalfae	VaMs.102	PKS 88	XP 003005392.1	Xyrrolin
Aspergillus fijiensis	CBS 313.89	PKS 89	XP 040801246.1
Colletotrichum truncatum	CMES1059	PKS 90	XP 036579997.1
Colletotrichum orchidophilum	IMI 309357	PKS 91	XP 022481711.1
Colletotrichum orchidophilum	IMI 309357	PKS 92	XP 022474292.1
Trichoderma arundinaceum	IBT 4083	PKS 93	RFU77043.1
Decorospora gaudefroyi	P77	PKS 94	KAF1829261.1
Penicillium expansum	CMP-1	PKS 97	KGO67320.1
Xenoacremonium sp.	ML-31	PKS 99	QOJ72663.1
Colletotrichum higginsianum	IMI 349063	PKS 100	XP 018163485.1
Acremonium chrysogenum	ATCC 11550	PKS 101	KFH44962.1
Alternaria alternata	NAF8	PKS 102	Q50LG3.1
Monosporascus sp.	GIB2	PKS 103	RYP23432.1
Aureobasidium subglaciale	EXF-2481	PKS 104	XP_013339858.1
Didymosphaeria enalia	CBS 304.66	PKS 105	KAF2257975.1	Sorbicillin
Aplosporella prunicola	CBS 121167	PKS 106	XP 033395184.1
Cylindrodendrum hubeiense	IHI 201604	PKS 107	KAF7554212.1	Chaetoviridin
Colletotrichum higginsianum	IMI 349063	PKS 108	XP 018155047.1	Lovastatin
Acremonium chrysogenum	ATCC 11550	PKS 109	KFH40913.1
Diaporthe helianthi	7/96	PKS 110	ALP31876.1
Pestalotiopsis microspora	NK17	PKS 111	APX43992.1
Thyridium curvatum	D216	PKS 112	XP 031000474.1
Monosporascus sp.	GIB2	PKS 113	RYP19385.1
Stylonectria norvegica	IHI 201603	PKS 114	KAF7560277.1
Acidomyces richmondensis	BFW	PKS 115	KYG45259.1
Floropilus chiversii	CS-36-62	PKS 116	C5H885.1	Radicicol
Pseudogymnoascus sp.	23342-1-I1	PKS 119	OBT66793.1
Cylindrodendrum hubeiense	IHI 201604	PKS 120	KAF7552999.1
Stachybotrys chlorohalonata	IBT 40285	PKS 122	KFA66804.1
Aplosporella prunicola	CBS 121167	PKS 125	XP 033394600.1
Acremonium chrysogenum	ATCC 11550	PKS 126	KFH43187.1
Tolypocladium inflatum	NRRL 8044	PKS 127	simG	Cyclosporine
Colletotrichum siamense	CAD1	PKS 128	KAF4880187.1
Aspergillus neoniger	CBS 115656	PKS 129	XP 025484624.1
Rutstroemia sp.	NJR-2017a BVV2	PKS 130	PQE12344.1
Monosporascus sp.	GIB2	PKS 131	RYP06624.1
Venustampulla echinocandica	BP 5553	PKS 132	XP 031874886.1	Acyl transferase hydrolase
Lachnellula suecica	CBS 268.59	PKS 133	TVY83046.1	Fumagillin dodecapentaenoate synthase
Beauveria brongniartii	RCEF 3172	PKS 134	OAA38781.1	Beta-ketoacyl synthase

## Sheet: Table S3
Table S3: List of reference NRPS proteins from various Fusarium and fungal species used in this study.
Species	Strain	NRPS clades	Protein ID or NCBI accession #	Metabolite
Fusarium oxysporum f. sp. lycopersici	Fol4287	NRPS 1	FOXG_17422	Malonichrome
Fusarium oxysporum f. sp. lycopersici	Fol4287	NRPS 2	FOXG_06448	Ferricrocin
Fusarium oxysporum f. sp. lycopersici	Fol4287	NRPS 3	FOXG_04898
Fusarium oxysporum f. sp. lycopersici	Fol4287	NRPS 4	FOXG_13024
Fusarium oxysporum f. sp. lycopersici	Fol4287	NRPS 6	FOXG_09785	Fusarinine
Fusarium oxysporum f. sp. lycopersici	Fol4287	NRPS 10	FOXG_02458
Fusarium oxysporum f. sp. lycopersici	Fol4287	NRPS 11	FOXG_09998
Fusarium oxysporum f. sp. lycopersici	Fol4287	NRPS 12	FOXG_13405
Fusarium oxysporum f. sp. lycopersici	Fol4287	NRPS 20	FOXG_04709
Fusarium oxysporum f. sp. lycopersici	Fol4287	NRPS 21	FOXG_10932
Fusarium oxysporum f. sp. lycopersici	Fol4287	NRPS 22	FOXG_11847	Enniatin/Beauverin
Fusarium oxysporum f. sp. lycopersici	Fol4287	NRPS 23	FOXG_11967
Fusarium oxysporum f. sp. lycopersici	Fol4287	NRPS 39	FOXG_22940	Ferrirhodin
Fusarium oxysporum f. sp. lycopersici	Fol4287	NRPS 40	FOXG_17272
Fusarium oxysporum f. sp. lycopersici	MN25	NRPS 41	FOWG_04281
Fusarium oxysporum f. sp. lycopersici	MN25	NRPS 42	FOWG_16001
Fusarium oxysporum f. sp. conglutinans	NRRL 54008	NRPS 36	FOPG_16291
Fusarium oxysporum f. sp. raphani	NRRL 54005	NRPS 43	FOQG_18874	Fumarylalanine
Fusarium oxysporum f. sp. vasinfectum	NRRL 25433	NRPS 44	FOTG_19103
Fusarium vanettenii	77-13-4	NRPS 1	86967	Malonichrome
Fusarium vanettenii	77-13-4	NRPS 2	103597	Ferricrocin
Fusarium vanettenii	77-13-4	NRPS 3	31971
Fusarium vanettenii	77-13-4	NRPS 4	44426
Fusarium vanettenii	77-13-4	NRPS 6	53641	Fusarinine
Fusarium vanettenii	77-13-4	NRPS 10	68854
Fusarium vanettenii	77-13-4	NRPS 11	54080
Fusarium vanettenii	77-13-4	NRPS 12	106273
Fusarium vanettenii	77-13-4	NRPS 13	106355
Fusarium vanettenii	77-13-4	NRPS 27	95699
Fusarium vanettenii	77-13-4	NRPS 28	76435
Fusarium vanettenii	77-13-4	NRPS 29	82887
Fusarium vanettenii	77-13-4	NRPS 30	106280
Fusarium graminearum	PH-1	NRPS 1	FGSG_11026	Malonichrome
Fusarium graminearum	PH-1	NRPS 2	FGSG_05372	Ferricrocin
Fusarium graminearum	PH-1	NRPS 3	FGSG_10523
Fusarium graminearum	PH-1	NRPS 4	FGSG_02315
Fusarium graminearum	PH-1	NRPS 5	FGSG_17487	Fusaoctaxin A
Fusarium graminearum	PH-1	NRPS 5	FGSG_13878	Fusaoctaxin A
Fusarium graminearum	PH-1	NRPS 6	FGSG_03747	Fusarinine
Fusarium graminearum	PH-1	NRPS 7	FGSG_08209	Fusaristatins
Fusarium graminearum	PH-1	NRPS 8	FGSG_15673
Fusarium graminearum	PH-1	NRPS 9	FGSG_10990	Fusaoctaxin A
Fusarium graminearum	PH-1	NRPS 10	FGSG_06507
Fusarium graminearum	PH-1	NRPS 11	FGSG_03245
Fusarium graminearum	PH-1	NRPS 12	FGSG_17574
Fusarium graminearum	PH-1	NRPS 13	FGSG_13153
Fusarium graminearum	PH-1	NRPS 14	FGSG_11395
Fusarium graminearum	PH-1	NRPS 15	FGSG_02394
Fusarium graminearum	PH-1	NRPS 16	FGSG_15872
Fusarium graminearum	PH-1	NRPS 17	FGSG_10702
Fusarium graminearum	PH-1	NRPS 18	FGSG_13783
Fusarium graminearum	PH-1	NRPS 19	FGSG_15676
Fusarium verticillioides	7600	NRPS 20	FVEG_03415
Fusarium verticillioides	7600	NRPS 21	FVEG_09864
Fusarium verticillioides	7600	NRPS 22	FVEG_16703	Enniatin/Beauverin
Fusarium verticillioides	7600	NRPS 23	FVEG_10547
Fusarium verticillioides	7600	NRPS 24	FVEG_06502
Fusarium verticillioides	7600	NRPS 25	FVEG_13313
Fusarium verticillioides	7600	NRPS 26	FVEG_06496
Fusarium fujikuroi	IMI58289	NRPS 31	FFUJ_00003	Apicidins
Fusarium pseudograminearum	CS3096	NRPS 32	FPSE_09183	W493
Fusarium clavum	CS3069	NRPS 33	BN850_0135880
Fusarium acuminatum	CS5907	NRPS 34	BN851_0093030
Fusarium acuminatum	CS5907	NRPS 35	BN851_0091890
Fusarium acuminatum	CS5908	NRPS 38	BN851_0047640
Fusarium acuminatum	CS5907	NRPS 14	BN851_0098530
Fusarium acuminatum	CS5907	NRPS 5	BN851_0095370	Fusaoctaxin A
Fusarium acuminatum	CS5907	NRPS 9	BN851_0095410	Fusaoctaxin A
Fusarium acuminatum	CS5907	NRPS 37	BN851_0091950
Fusarium acuminatum	CS5907	NRPS 36	BN851_0127860
Fusarium avenaceum	Fa05001	NRPS 37	FAVG1_02767
Fusarium avenaceum	Fa05001	NRPS 45	FAVG1_08651
Fusarium avenaceum	Fa05001	NRPS 46	FAVG1_11373
Fusarium avenaceum	Fa05001	NRPS 47	FAVG1_02234
Fusarium avenaceum	Fa05001	NRPS 48	FAVG1_09641
Fusarium avenaceum	Fa05001	NRPS 49	FAVG1_07835
Fusarium avenaceum	Fa05001	NRPS 50	FAVG1_02773
Fusarium avenaceum	Fa05001	NRPS 51	FAVG1_10902
Fusarium avenaceum	Fa05001	NRPS 52	FAVG1_08578
Fusarium avenaceum	Fa05001	NRPS 14	FAVG1_11316
Fusarium avenaceum	Fa05001	NRPS 5	FAVG1_10207	Fusaoctaxin A
Fusarium avenaceum	Fa05001	NRPS 9	FAVG1_10209	Fusaoctaxin A
Fusarium culmorum	CS7071	NRPS 8	BN852_0000410
Alternaria alternata	M-71		AAF01762.1	AM-toxin
Alternaria brassicae			AAP78735.1
Acremonium chrysogenum	ATCC 11550		P25464.1	Cephalosporin
Aspergillus fumigatus	Af293		EAL88817.1	Gliotoxin
Aspergillus fumigatus	Af293		EAL91592.1
Aspergillus fumigatus	Af293		EAL86624.1	TAFC
Aspergillus nidulans	FGSC A4		XP_660225.1	L-aminoadipate-semialdehyde dehydrogenase acvA
Bipolaris zeicola	SB111		AAA33023.2	HC-toxin
Bipolaris maydis			AAX09983.1
Bipolaris maydis			AAX09984.1	Ferricrocin
Bipolaris maydis			AAX09985.1
Bipolaris maydis			AAX09986.1
Bipolaris maydis			AAX09987.1
Bipolaris maydis			AAX09988.1	Coprogen
Bipolaris maydis			AAX09989.1
Bipolaris maydis			AAX09990.1
Bipolaris maydis			AAX09991.1
Bipolaris maydis			AAX09992.1
Bipolaris maydis			AAX09993.1
Bipolaris maydis			AAX09994.1
Claviceps purpurea	P1		CAB39315.1	D-lysergic acid
Epichloe festucae	Fl1		BAE06845.2	Peramine
Fusarium equiseti	ETH 1536/J5		CAA79245.2	Enniatin
Fusarium heterosporum	ATCC 74349		AGO86662.1	Equisetin
Fusarium verticillioides			AAT28740.1	Fusarin C
Trichoderma virens			AAM78457.1	Peptaibol
Plenodomus lingam	M1		AAO49458.1
Plenodomus lingam	M1		AAS92545.1	Sirodesmin PL
Metarhizium anisopliae	ME1		CAA61605.1
Magnaporthe oryzae	Guy11		CAG28798.1
Magnaporthe oryzae	Guy11		CAG28798.1
Magnaporthe oryzae	70-15		CAH59193.2
Neurospora crassa	OR74A		XP_963411.3	Coprogen
Penicillium chrysogenum	CMI 314652		CAA38195.1	Penicillin
Claviceps purpurea	P1		CAD28788.1	Ergotamine
Claviceps purpurea	P1		CAI59267.1	PS3
Claviceps purpurea	P1		CAI59268.1	Ergocryptine
Schizosaccharomyces pombe	972h-		CAB88271.1	aminoadipate-semialdehyde dehydrogenase
Tolypocladium inflatum	ATCC 34921		CAA82227.1	Scyclosporine
Ustilago maydis			AAB93493.1	Ferrichrome

## Sheet: Table S4
Table S4: Distribution of polyketide synthases (PKS) identified in ten clade 3 FSSC genomes and their protein IDs.
Species	Strain	PKS 2	PKS 3	PKS 7	PKS 8	PKS 10	PKS 13	PKS 22	PKS 25	PKS 29	PKS 30	PKS 31	PKS 32	PKS 33	PKS 35	PKS 44	PKS 49	PKS 54	PKS 89	PKS 112	PKS 116	PKS 119	PKS 125	PKS 127	PKS A	PKS B	PKS C	PKS D
Fusarium vanettenii	77-13-4		1761150	1713192	1752482	1529154*		1768425		1482064		1704238	1593910	1488307*	1523684					1531611		1583123*				1618797	1628623*
Fusarium vanettenii	T23		427337	421777	422380	426079*		342765		389876	423980	429775	391921	401041	428646					381006		161815*				264383	389844*	391870, 424493, 417992
Fusarium tenuicristatum	NRRL 22470	686925	649413	728051	730653		53873*	273772	248707	731096	646010		707518	590097	724427			708393		714929	685102*		721803	694717*		198681
Fusarium mori	NRRL 22230		303550	302023	299708	304906*		254773		302534	302461	263324	307008	302865	306580							194236*			288368*	285999	307417*
Fusarium cucurbiticola	NRRL 22165		489292	363539				501395			376554	472919, 433439	482877	479711	484567	226825										402658
Fusarium bataticola	NRRL 22400	360309	388089	273996	244271	378692*		374071		374570	374785	376094	390719	376543	249404		380602*			372244*		389828*				113888	278805*
Fusarium solani	FS5		564909	440498	432420	578349*		505189		574928	570066	569083	446835	539290	557112								389943	574517*	390658*	389694
Fusarium ambrosium	NRRL 20438	CDV31_009534	CDV31_005496	CDV31_003164	CDV31_014921			CDV31_006985		CDV31_005698	CDV31_012377	CDV31_004604	CDV31_001656	CDV31_002031	CDV31_001766				CDV31_004764						CDV31_014238*	CDV31_008986
Fusarium euwallaceae	UCR1854	BHE90_013160	BHE90_012771	BHE90_012704	BHE90_006524			BHE90_011150		BHE90_002981	BHE90_003791	BHE90_001385	BHE90_000124	BHE90_006090	BHE90_003487										BHE90_003195*	BHE90_012406
Fusarium floridanum	NRRL62606	CEP51_007064	CEP51_004260	CEP51_008298	CEP51_003755			CEP51_009247		CEP51_011141	CEP51_007298	CEP51_001128	CEP51_004483	CEP51_006924	CEP51_007749				CEP51_008742						CEP51_005809	CEP51_008973
Metabolite			Fusarubins		Gibepyrone	Fusarins	Radicicol								Pigment		Curvupallide-B	Eupenifeldin	Monacolin K		Radicicol			Cyclosporin
Hybrid with						NRPS (same protein ID)	PKS 116							NRPS C			NRPS (same protein ID)			T-GCF6	PKS 13	PKS C		NRPS G	NRPS H		PKS 119
Notes: PKS proteins that were identified as part of a hybrid cluster are indicated with a red asterisk. PKS-NRPS hybrids with same core biosynthetic protein are only classified in PKS category as with previous studies.

## Sheet: Table S5
Table S5: Distribution of nonribosomal peptide synthetases (NRPS) identified in ten clade 3 FSSC genomes and their protein IDs.
Species	Strain	NRPS 1	NRPS 2	NRPS 3	NRPS 4	NRPS 5	NRPS 6	NRPS 9	NRPS 10	NRPS 11	NRPS 12	NRPS 13	NRPS 21	NRPS 27	NRPS 28	NRPS 29	NRPS 30	NRPS 39	NRPS 43	NRPS A	NRPS B	NRPS C	NRPS D	NRPS E	NRPS F	NRPS G	NRPS H
Fusarium vanettenii	77-13-4	1737075	1176500	1520702	1744657		1517283		1654454	54080	106273	106355		1720093	1634038, 1729103	1744328	1758393			1743575	1504506	1528315*	1723735		1481433
Fusarium vanettenii	T23	418927	84767	405749	430733		430094		55736	427735	400373	414132		153801	238042, 401305	415077	415406			414553	159402		430243		383520
Fusarium tenuicristatum	NRRL 22470	726034	282263	387520	729957		367066		314395	716893	538651	529532	516521	353854	523474, 180709	721857	730639			722635	599848				662570	640914*
Fusarium mori	NRRL 22230	279659	200769	293538			32506		88120	263879	277965	281897		134726	259545	304734	288088			305906	251717		299095		285925		304820*
Fusarium cucurbiticola	NRRL 22165	483218	146823	522	454885		433160		198228	400981	480735	337811		246993	159516	476624	465182, 438257			426081	457481		478384		340591		350867
Fusarium bataticola	NRRL 22400	390171	382434	244226	375174*	226838*	373099	386112*	223243	260701	268090	218958		386777	264688	343769	220000	296202		350608	296148	333390	331435		360065		378466
Fusarium solani	FS5	397123	458126	156726	571308*		39227		483527	595513	578901	511217		71658	15339, 529757	578703	442051	558599	467647	535291	434410	517732	513417		575988	574507*	578566*
Fusarium ambrosium	NRRL 20438	CDV31_ 006605, CDV31_ 006604	CDV31_012162	CDV31_ 015715	CDV31_ 014046		CDV31_007831		CDV31_005831	CDV31_014448	CDV31_000920	CDV31_015452		CDV31_ 005868	CDV31_ 002782, CDV31_004569	CDV31_001045		CDV31_ 011572		CDV31_014493	CDV31_015752	CDV31_002081	CDV31_010414		CDV31_002925		CDV31_014236*
Fusarium euwallaceae	UCR1854	BHE90_ 001203	BHE90_ 015339	BHE90_ 013348		BHE90_ 014595*	BHE90_ 014915	BHE90_ 014597*	BHE90_ 006784	BHE90_000501	BHE90_005993	BHE90_015168		BHE90_ 009087	BHE90_ 004548	BHE90_000784		BHE90_008568		BHE90_008998	BHE90_009023	BHE90_006038	BHE90_000478	BHE90_016167*	BHE90_002383		BHE90_003197*
Fusarium floridanum	NRRL62606	CEP51_011760	CEP51_007720	CEP51_ 015318			CEP51_ 012259		CEP51_ 011300	CEP51_010518	CEP51_002418	CEP51_012762		CEP51 005380	CEP51_ 002068, CEP51_008493					CEP51_003699	CEP51_003511	CEP51_002745	CEP51_009110	CEP51_015504*	CEP51_003413
Metabolite		Malonichrome	Ferricrocin			Fusaoctaxin A	Fusarinine	Fusaoctaxin A						Metachelin			Sansalvamide	Ferrirhodin	Fumarylalanine							Cyclosporin	Pyranonigrin E
Hybrid with					I-GCF4	NRPS 9		NRPS 5														PKS 33		T-GCF9		PKS 127	PKS A
Notes: NRPS proteins that were identified as part of a hybrid cluster are indicated with a red asterisk. PKS-NRPS hybrids with same core biosynthetic protein are only classified in the PKS category as with previous studies.

## Sheet: Table S6
Table S6: Distribution of terpene synthase/cyclase gene cluster families (T-GCF) identified in ten clade 3 FSSC genomes and their core biosynthetic protein IDs.
Species	Strain	T-GCF1	T-GCF2	T-GCF3	T-GCF4	T-GCF5	T-GCF6	T-GCF7	T-GCF8	T-GCF9	T-GCF10	T-GCF11	T-GCF12	T-GCF13	T-GCF14	T-GCF15	T-GCF16	T-GCF17	T-GCF18
Fusarium vanettenii	77-13-4	1662970	1770538	1580514	1614635	1513637	1498145
Fusarium vanettenii	T23	386770	386485	420177	99341	336608	407432		415704, 415797				404977
Fusarium tenuicristatum	NRRL 22470	689767	707481	693230	258687	638175	524104	753391						697732	713553	746919
Fusarium mori	NRRL 22230	34490	279762	285189	293763	271816	283839	280747			292393, 280442	283731
Fusarium cucurbiticola	NRRL 22165	414684			4572	415869													473889
Fusarium bataticola	NRRL 22400	316469	404919	12006	2725	269544	236775*	365694
Fusarium solani	FS5	391762	559267	117765	98474	490730		467131
Fusarium ambrosium	NRRL 20438	CDV31_003828	CDV31_001676	CDV31_011525	CDV31_000015												CDV31_004793
Fusarium euwallaceae	UCR1854	BHE90_016497	BHE90_000100	BHE90_005424	BHE90_006392					BHE90_016164*
Fusarium floridanum	NRRL62606	CEP51_005916	CEP51_004461	CEP51_006615	CEP51_015043					CEP51_015501*								CEP51_016514
Predicted Metabolite					Squalestatin	Clavaric acid	Aspterric acid					Gibberellin
Hybrid with							PKS 112			NRPS E
Notes: Terpene synthase/cyclase proteins that were identified as part of a hybrid cluster are indicated with a red asterisk.

## Sheet: Table S7
Table S7: Distribution of the DMATS gene cluster families (I-GCF) identified in ten clade 3 FSSC genomes and their core biosynthetic protein IDs.
Species	Strain	I-GCF1	I-GCF2	I-GCF3	I-GCF4	I-GCF5
Fusarium vanettenii	77-13-4	1728378		1730208
Fusarium vanettenii	T23	419574
Fusarium tenuicristatum	NRRL 22470	726521		710285
Fusarium mori	NRRL 22230	299314
Fusarium cucurbiticola	NRRL 22165	475466		443707
Fusarium bataticola	NRRL 22400	389526			332754*
Fusarium solani	FS5	534240			408292*
Fusarium ambrosium	NRRL 20438	CDV31_015832	CDV31_015243
Fusarium euwallaceae	UCR1854	BHE90_014454	BHE90_013089			BHE90_017350
Fusarium floridanum	NRRL62606	CEP51_002963	CEP51_013596
Hybrid with					NRPS 4
Notes: DMATS proteins that were identified as part of a hybrid cluster are indicated with a red asterisk.

## Sheet: Table S8
Table S8: Distribution of the phosphonate producing gene cluster families (P-GCF) identified in ten clade 3 FSSC genomes and their core biosynthetic protein IDs.
Species	Strain	P-GCF1	P-GCF2	P-GCF3
Fusarium vanettenii	77-13-4	1759286
Fusarium vanettenii	T23	390318
Fusarium tenuicristatum	NRRL 22470	730252	710725
Fusarium mori	NRRL 22230	303746
Fusarium cucurbiticola	NRRL 22165			431815
Fusarium bataticola	NRRL 22400	327823
Fusarium solani	FS5	537108
Fusarium ambrosium	NRRL 20438	CDV31_010455
Fusarium euwallaceae	UCR1854	BHE90_013019
Fusarium floridanum	NRRL62606	CEP51_010915
Notes: None of the phosphonate BGCs were part of a hybrid cluster.
